# Supplementary material for: A Gene Island with Two Possible Configurations Is Involved in Chromatic Acclimation in Marine Synechococcus
Source: PubMed Central journal article supplement (PMC3877281; doi:10.1371/journal.pone.0084459), 2013-12-31
Supplement: pone.0084459.s001.pdf [file pone.0084459.s001.pdf]

SUPPLEMENTARY INFORMATION

A

BL107\_FoiA1-342 1 MKARKAKEYFVNDLLSMESYCIDHYSDDYYSKSNFSCNVTLQSKGELVTSICAPINDAHLEIFKSNQTLIYEEEAQNQNSVAF... 115
CC9902\_FoiA1-342 1 MKARKAKEYFVNDLLSMESYCIDHYSDDYYSKSNFSCNVTLQSKGELVTSICAPINDAHLEIFKSNQTLIYEEEAQNQNSVAF... 115
RCC307\_FoiA1-343 1 MRAKKAKEYYFSDLLGMEAYCRSHYAEYYSKSNFSCNVTLQSKGELLTSSICAPINDVHLELIFKSNQTLIYEEEAQNQNSVAF... 115
RS9916\_FoiA1-342 1 MRSKKAKEYIFSDLLGMEYCRSHYAEYYSKSNFSCNVTLQSKGELLTSSICAPINNVHLEIFKSNQTLIYEEEAQNQNSVAF... 115
CC9311\_FoiA1-344 1 MKARKAKEYFVNDLLGMEYCRSHYAEYYSKSNFSCNITQLSKGELQTSICAPINNVHLEIFKSNQTLIYEEEAQNQNSVAF... 115
WHB020\_FoiA1-344 1 MKARKAKEYFVNDLLGMEYCRSHYAEYYSKSNFSCNITQLSKGELQTSICAPINNVHLEIFKSNQTLIYEEEAQNQNSVAF... 115
WHB109\_FoiA1-343 1 LKRRSRNRYVSDTLEMEEFCAHFEYHSTSFSGCNVTQLSTGLLETKTTCSPIDQVHLEIFKSNQTLIYEEEAQNQNSVAF... 116
MINOS11\_FoiA1-346 1 VLRKPASHYSFTDLEMEECCHAFSEYYQGSFAFDCNVTLQSGSLLTKTICSPVVDIHLFEFESNQALLYEEEAQNQNSVAF... 116
PROS-U1\_FoiA1-343 1 LRRKRSRNYVFCDTLEMEEFCAHFEYHSTSFSGCNVTQLSTGILETQTTCSPIDQVHLEIFKSNQTLIYEEEAQNQNSVAF... 116
WHB016\_FoiA1-343 1 MKARKAKEYFVNDLLGMEYCRSHYAEYYSKSNFSCNITQLSKGELQTSICAPINNVHLEIFKSNQTLIYEEEAQNQNSVAF... 115
MVIR-18-1\_FoiA1-344 1 MKARKAKEYFVNDLLGMEYCRSHYAEYYSKSNFSCNITQLSKGELQTSICAPINNVHLEIFKSNQTLIYEEEAQNQNSVAF... 115
A15-62\_FoiA1-343 1 LRRKRSRNYIFSDTLEMEEFCAHFEYHSTSFSGCNVTQLSTGLLETKTTCSPIDQVHLEIFKSNQTLIYEEEAQNQNSVAF... 116
RS9915\_FoiA1-344 1 LRRKRSRNYVFCDTLEMEEFCAHFEYHSTSFSGCNVTQLSTGILETQTTCSPIDQVHLEIFKSNQTLIYEEEAQNQNSVAF... 116
BIOS-U3-1\_FoiA1-343 1 MKARKAKEYFVNDLLGMEYCRSHYAEYYSKSNFSCNITQLSKGELQTSICAPINNVHLEIFKSNQTLIYEEEAQNQNSVAF... 115
WHB103\_FoiA1-343 1 LRRKRSRNYVFCDTLEMEEFCAHFEYHSTSFSGCNVTQLSTGILETQTTCSPIDQVHLEIFKSNQTLIYEEEAQNQNSVAF... 116

Consensus

MK KKAKEYYFSD LLGME YCK Hy EYYSKSNFSCNVTLQSKGELTSSICAPINDVHLEIFKSNQTLIYEEEAQNQNSVAF...
M+AKKAKEYYFSDLLGMEYCK+HYEYYSKSNFSCNVTLQSKGELTSSICAPINDVHLEIFKSNQTLIYEEEAQNQNSVAF...
CWIN+GKKDPESNTIISGHKMDLSIAGFNRLN

BL107\_FoiA1-342 116 KTGGNVWDIVGANTQLCCMS-LKWEKMKKIKDMNAYNAFALEECIGIDSNSSASIQLSLFRHFHTKG-LREAEAFYDLAIATLEED... 228
CC9902\_FoiA1-342 116 KTGGNVWDIVGANTQLCCMS-LKWEKMKKIKDMNAYNAFALEECIGIDSNSSASIQLSLFRHFHTKG-LREAEAFYDLAIATLEED... 228
RCC307\_FoiA1-343 116 KTGGNVWDIVGANTQLCCMS-LKWDKLGKIQDKMNAAYARLEECIGIDSEAPSSSLKGLFRHFHTKG-VQCQSFYDLAIATLEED... 229
RS9916\_FoiA1-342 116 KTGGNVWDIVGANTQLCCMS-LKWDKLGKIQDKMNAAYARLEECIGIDSEATSSSLKGLFRHFHTKG-VKCQSFYDLAIATLEED... 229
CC9311\_FoiA1-344 116 KTGGNVWDIVGANTQLCCMS-LKWKIMKEKIKDMNAYNAFALEECIGIDSKSAASIQLRFLDKHFHKG-MTSADEFYDLAIATLEED... 229
WHB020\_FoiA1-344 116 KTGGNVWDIVGANTQLCCMS-LKWKIMKEKIKDMNAYNAFALEECIGIDSNSSASIQLRFLDKHFHKG-MTSADEFYDLAIATLEED... 229
WHB109\_FoiA1-343 117 KTGGNVWDIVGANEELCCMS-LKWNKLGKIQDKMNAAYARLEECIGIDSHDHASIQLKLFYHFFHKG-VAKANGFYDLAIATLEED... 231
MINOS11\_FoiA1-346 117 KTGGNVWNLGTLNSKLCMS-LRWERLNKRIGSLKAYEAYARLEECIGIDSSNSTVQLKRLVKEHFHKGKITQPAKAFDLAIATLEED... 231
PROS-U1\_FoiA1-343 117 KTGGNVWDIVGANEELCCMS-LKWNKLGKIQDKMNAAYARLEECIGIDSDHASTQLKLFYHFFHKG-VAKANGFYDLAIATLEED... 231
WHB016\_FoiA1-343 116 KTGGNVWDIVGANEELCCMS-LKWKLMKEKIDEMNAYNAFALEECIGIDSNSSASIQLRFLDKHFHKG-MTSADEFYDLAIATLEED... 228
MVIR-18-1\_FoiA1-344 116 KTGGNVWDIVGANTQLCCMS-LKWKIMKEKIDEMNAYNAFALEECIGIDSNSSASIQLRFLDKHFHKG-MTSADEFYDLAIATLEED... 229
A15-62\_FoiA1-343 117 KTGGNVWDIVGANEELCCMS-LKWNKLGKIQDKMNAAYARLEECIGIDSHDHASIQLKLFYHFFHKG-VAKANGFYDLAIATLEED... 231
RS9915\_FoiA1-344 117 KTGGNVWDIVGANEELCCMS-LKWNKLGKIQDKMNAAYARLEECIGIDSDHASTQLKLFYHFFHKG-VAKANGFYDLAIATLEED... 232
BIOS-U3-1\_FoiA1-343 116 KAGGNVWDIVGANTQLCCMS-LKWEKLGKIQDKMNAAYARLEECIGIDSECTKQLKLFYHFFHKG-LKCQSFYDLAIATLEED... 229
WHB103\_FoiA1-343 117 KTGGNVWDIVGANEELCCMS-LKWNKLGKIQDKMNAAYARLEECIGIDSDHASTQLKLFYHFFHKG-VAKANGFYDLAIATLEED... 231

Consensus

KTGGNVWDIVGANTQLCCMS-LKWKLMKEKIDEMNAYNAFALEECIGIDSNSSASIQLRFLDKHFHKG-MTSADEFYDLAIATLEED...
KTGGNVWDIVGANTQLCCMS-LKWNKLGKIQDKMNAAYARLEECIGIDSDHASTQLKLFYHFFHKG-VAKANGFYDLAIATLEED...
TERSESTDLIEDLVKLLHED

BL107\_FoiA1-342 229 REGMPPLTISEITKYLNTKEKESLSIACRNFDMPILDLKSIRLEQVKKSYLNPHVPGKLNFTKKNALYYGFKNWITFQKLYQTFQESPEET... 342
CC9902\_FoiA1-342 229 REGMPPLTISEITKYLNTKEKESLSIACRNFDMPILDLKSIRLEQVKKSYLNPHVPGKLNFTKKNALYYGFKNWITFQKLYQTFQESPEET... 342
RCC307\_FoiA1-343 230 RPGLPPLTIAGITQYLNDSKSLRESQASFDMSILDILKSIRLEQVKKSYLNPHVPGKLNFTKKNALYYGFKNWITFQKLYQTFQESPEET... 343
RS9916\_FoiA1-342 230 RPGLPPLTISEITKYLNSDAKSLRESQASFDMSILDILKSIRLEQVKKSYLNPHVPGKLNFTKKNALYYGFKNWITFQKLYQTFQESPEET... 342
CC9311\_FoiA1-344 230 REGLPPLTIGEITKYLNSKESVGVQVCRSTFNMNILDILKSIRLEQVKKSYLNPHVPGKLNFTKKNALYYGFKNWITFQKLYQTFQESPEET... 344
WHB020\_FoiA1-344 230 REGLPPLTIGEITKYLNSKESVGVQVCRSTFNMNILDILKSIRLEQVKKSYLNPHVPGKLNFTKKNALYYGFKNWITFQKLYQTFQESPEET... 344
WHB109\_FoiA1-343 232 RAGMPPITLDEITEYLNSENTESLNTICRKNFNMVDIELVRRIRLEQTRKAFRLTPHSSTGLKDFTKKRTALYYGFKNWITFQKLYQTFQESPEET... 343
MINOS11\_FoiA1-346 232 RAGMPPITLDEITEYLNSENTESLNTICRKNFNMVDIELVRRIRLEQTRKAFRLTPHSSTGLKDFTKKRTALYYGFKNWITFQKLYQTFQESPEET... 343
PROS-U1\_FoiA1-343 232 RAGMPPITLDEITEYLNSENTESLNTICRKNFNMVDIELVRRIRLEQTRKAFRLTPHSSTGLKDFTKKRTALYYGFKNWITFQKLYQTFQESPEET... 343
WHB016\_FoiA1-343 229 RPGLPPLTIGEITKYLNSKESVGVQVCRSTFNMNILDILKSIRLEQVKKSYLNPHVPGKLNFTKKNALYYGFKNWITFQKLYQTFQESPEET... 343
MVIR-18-1\_FoiA1-344 230 RAGMPPITLDEITEYLNSENTESLNTICRKNFNMVDIELVRRIRLEQTRKAFRLTPHSSTGLKDFTKKRTALYYGFKNWITFQKLYQTFQESPEET... 343
A15-62\_FoiA1-343 233 RAGMPPITLDEITEYLNSENTESLNTICRKNFNMVDIELVRRIRLEQTRKAFRLTPHSSTGLKDFTKKRTALYYGFKNWITFQKLYQTFQESPEET... 344
RS9915\_FoiA1-344 233 RAGMPPITLDEITEYLNSENTESLNTICRKNFNMVDIELVRRIRLEQTRKAFRLTPHSSTGLKDFTKKRTALYYGFKNWITFQKLYQTFQESPEET... 344
BIOS-U3-1\_FoiA1-343 230 RLGLPPLSISDITKFLNSKESVGVQVCRSTFNMNILDILKSIRLEQVKKSYLNPHVPGKLNFTKKNALYYGFKNWITFQKLYQTFQESPEET... 343
WHB103\_FoiA1-343 232 RAGMPPITLDEITEYLNSENTESLNTICRKNFNMVDIELVRRIRLEQTRKAFRLTPHSSTGLKDFTKKRTALYYGFKNWITFQKLYQTFQESPEET... 343

Consensus

RGLPPLTISEITKYLNSKESVGVQVCRSTFNMNILDILKSIRLEQVKKSYLNPHVPGKLNFTKKNALYYGFKNWITFQKLYQTFQESPEET...
RAGL PPLTI+EITKYLNSKESLNTACRSTFNM+ILELILKSIRLEQVKKSYLNPHVPGKLNFTKKNALYYGFKNWITFQKLYQTFQESPEET...
IDKSSK+SVLVSCLKRER++

PFAM PF12833

SMART SM00342

PROFILE PS01124



B

RCC307\_FeiB/1-315 1 - MKLSLSYKDPQLQSETLAEELGQNTTRITQLDLGEGTYSMSHAMSSGVSIAEIKASKTLLYEGWGTGWSVDFNWI TPIKATTDPFYCEGYEMRNSISGGLNTINSAPGSSWG 111  
 CC9902\_FeiB/1-318 1 - MKLELSYSDHLQLSESLNELGQTRITQLPEGEGKYTMSFKQSTGIALAEIQSTQPLLYEGWGTGWSVDFNWI TPTCHLNDPFYCEGYEMKETS LGGFNTLNTSPGNSWG 111  
 CC9311\_FeiB/1-318 1 - MKLQLAYTDPQLQSETLQAYGGVTRITQLESEGEGYSMSHKKSSMAIAEICASKPLLYEGWGTGWSVDFNWI TPMRKSNYPFYCEGYDMMLNSLGGKFTHSNSGDSWG 111  
 PROS-U-1\_FeiB/1-321 1 - MKTTFEFRDPLEISEELAKLGLTKITQLDGGNGIYTMQAATANKVSLAEISANKTLLYEGWGTGWSVDFNWI TPKIDIQDAFGYCDGFKMAKNSLAGFTINSIPGNAWG 111  
 MVIR-18-1\_FeiB/1-318 1 - MKIKFAYTDPQLQSETLQEQYGGVTRISQLESEGEGYSMSHQKSTGMAIAEISASKPLLYEGWGTGWSVDFNWI TPIRKANSFPFYCEGFDMMNDSLGGFNTFHSNPGDSWG 111  
 WHB016\_FeiB/1-316 1 - MKVKFSYTDPLQLSETLQKQYDFRITQLETEGEGYSMAHERSSGMAIAEISASKPLLYEGWGTGWSVDFNWI TPIQKASYPHGYCDGFDMSDNLGGKFTFRNSPGDSWG 111  
 WHB020\_FeiB/1-318 1 - MKLQFAYTDPQLQSETLQAYGGVTRITQLESEGEGYSVSHKSSMAIAEISASKPLLYEGWGTGWSVDFNWI TPMRKTTPFYCEGYDMKTNLGGKFTINSIPGNAWG 111  
 WHB109\_FeiB/1-321 1 - MKTSEYRDPLEISEELAKLGLTKITQLDGGNGIYTMQAANTNKVALAEISANKTLLYEGWGTGWSVDFNWI TPKANTQGVFGYCDGFKMTKNSLAGFTINSIPGNAWG 111  
 RS9916\_FeiB/1-316 1 MIKLSLSYKDPHLSETLAEELGQNTTRITQLDRGEGTYSMSHAIASGVSIAEIKASKTLLYEGWGTGWSVDFNWI TPLKSSADPLFYCEGYEMRNSISGGLNTLNTSTASSWG 112  
 BL107\_FeiB/1-318 1 - MKLELAYSDDHQLSESLNELGQTRITQLEPEGKYTMSFKQSSAGIALAEIQSTQPLLYEGWGTGWSVDFNWI TPTCOFNDPFYCEGYEMKEASLGGFNTLNTSPGNSWG 111  
 WHB103\_FeiB/1-321 1 - MNKTFDYRDPLEISEELAKLGLTKITQLDGGNGIYTMQAATANKVSLTEISANKTLLYEGWGTGWSVDFNWI TPKIDIQDAFGYCDGFKMEKNSLAGFTINSIPGNAWG 111  
 A15-62\_FeiB/1-321 1 - MKTSEYRDPLEISEELAKLGLTKITQLDGGNGIYTMQAANTNKVTLAEISANKTLLYEGWGTGWSVDFNWI TPKANTQGAFGYCDGFKMTKNSLAGFTINSIPGNAWG 111  
 BIOS-U3-1\_FeiB/1-315 1 - MKLSPYSDDLQSETLNLGQLTRITQFDGAGSYSMTHSMASGSIASIAEKASKTLLYEGWGTGWSVDFNWI TPLKNSVAPMGLECYEMKANSIGGLNTYNSPGSSWG 111  
 MNOS11\_FeiB/1-332 1 - MSIIIEYKDPNLSEELQKLGQSTRITQFENGGGYTKISPLQYKTVSVAQIESSTKLLYEGWGTGWSVDFNWI TPLGRKVEGLRCDGGRMTNSLAGFATISPPFRNSWG 111  
 RS9915\_FeiB/1-321 1 - MNKTFDYRDPLEISEELAKLGLTKITQLDGGNGIYTMQAATANKVSLTEISANKTLLYEGWGTGWSVDFNWI TPKIDIQDAFGYCDGFKMKRNSLAGFTINSIPGNAWG 111

Consensus

MKLS+YDPLQLSE-L LGQTRITQLDGGEGYS+MSHA++SGV++AEISASKTLLYEGWGTGWSVDFNWI TPK+KTQDPFYCEGY+MNSLGGFT+NSPGNSWG  
 -MKLS++YRDPQLQSETLAKLGLTKITQLEGGEGYS+MSHA++SGV++AEISASKTLLYEGWGTGWSVDFNWI TPK+KTQDPFYCEGY+MKNKSLGGFNTINS+PGNSWG

RCC307\_FeiB/1-315 112 KYSEACSSSTACMLDKAVLIDSLKACNAQTALENLTKRGLDVFHFAALQLRKLASDMSKGI VNAA - KYDDLITACLEEGTVRHYKKSSELKNLGLLSEIVLSLHSDVMQSP 222  
 CC9902\_FeiB/1-318 112 KYSNCCSSSTACMLDKNILMKLKECNAQAIDNLSKARGLDVSSLSYQLKLLTRKDLVRGIMNPT - KYDDLIVACLEEGDKRGRYKGLTKNYRLLGEIVQLSHDSRRMSSP 222  
 CC9311\_FeiB/1-318 112 KYSECCSSSTACMLDKTILLNLRDCNASHAIDNLSQSSGLDIDHEAFALRLLRRLRELKVGISDPS - KYDDLMTIACLEEGSKRQYKQKQVKNQRLLGEIVNLSHDLDKMSSP 222  
 PROS-U-1\_FeiB/1-321 112 KYSECCSSSTACMLDKIILLELQNKAYDGLERLSDQGGVYNNNALGQLKRLARKEVSSGIQTP - KYFDLVIACLEEGMSEQNS-HGEKNIQGLREIINLAHSQKSMSSP 221  
 MVIR-18-1\_FeiB/1-318 112 KYSECCSSSTACMLDKKILLDKLQEKASHAIDNLSQSMGLVIDHEAFTLRKLRDLVKGISNPS - KYDDLMTIACLEEGNRRLFKKKQAKNQRLLGEIVDLAHDLDQMSSP 222  
 WHB016\_FeiB/1-316 112 KYSECCSATACMLDKIILLDKLEECCANRALIHLQSIGLVIDHEAFTLRLLRDLVQGISNPS - KYDDLMTIACLEEGHRLYKQKQAKNQRLLGEIVNLSHDPDKMSSP 222  
 WHB020\_FeiB/1-318 112 KYSECCSSSTACMLDKIILLNLRDCNASHAIDSLRSIGLDIDHEAFAALRLLRDLVKGISNPS - KYDDLMTIACLEEGIHRGYKQKQVKNQRLLAEIVNLSHDSKSMSSP 222  
 WHB109\_FeiB/1-321 112 KYNNECCSSSTACMLDKQLLFELLENCKAYDGLERLSDQGGIYCNNTALNQLKRLAAREVSAGIQNPE - KYFDLVIACLEEGPMTQNS-QDPHIDQLREIIDLASEKTMSSP 221  
 RS9916\_FeiB/1-316 112 KYSECCSSSTACMLDKALLIDSLKACNAQVALDNLNKRGLDVHHPAALQLRKLARKEVSSGIQTP - KYDDLITACLEEGTVRHYRKAELRQGLLSEIVLSLHSDVMQSP 223  
 BL107\_FeiB/1-318 112 KYSNCCSSSTACMLDKNILMKLKECNAQAIDNLSKARGLDVHNSLHQLKLLTRKDLVKGIMNPT - KYDDLIVACLEEGSNKRGYKGLTKNYRLLGEIVLSHDSRRMSSP 222  
 WHB103\_FeiB/1-321 112 KYSECCSSSTACMLDKIILLELLENCKAYDGLERLSDQGGVYNNNALGQLKRLARKEVSSGIQTP - KYFDLVIACLEEGPMSDQNS-HGQKNIQGLREIINLAHSQKSMSSP 221  
 A15-62\_FeiB/1-321 112 KYNNECCSSSTACMLDKQLLELLENCKAYDGLERLSDQGGIYCNNTALNQLKSLAAKEVSSGIQTP - KYFDLVIACLEEGPMTAQS-QDPHIDQLREIIDLASEKTMSSP 221  
 BIOS-U3-1\_FeiB/1-315 112 KYSRCCSSSTACMLDKASLMEAMICNAQVIGLNDGKGLVSDQLNQLKRLARKEVSSGIQTP - KYDDLITACLEEGRSRAIKKGETKNHTLLSEIVRLAHDTEKMSAP 222  
 MNOS11\_FeiB/1-332 112 RYTNNCTSTACMVRKSDFDYLHECKAYNALERIDGIDGMECEPKHLAQLKRLVERNIRROEESIDSKYFEILTACLEEQITVSDSIQSPKNVDLLREIVKLAHSDVMTKP 223  
 RS9915\_FeiB/1-321 112 KYSECCSSSTACMLDKIILLELLENCKAYDGLERLSDQGGVYNNNALGQLKRLARKEVSSGIQTP - KYFDLVIACLEEGPMSDQNS-HGQKNIQGLREIINLAHSQKSMSSP 221

Consensus

KYS CSSTACMLDK LLE L CNA LE L G L AL QL KR R K D L G I N P KY DL A C L E E G Y KN L L E I V L H D M S P  
 KYSE+CSSTACMLDKKILLELLE+CNAQYDLENLSD+GLDI++EAL+QLKRLARKDLSSGIQTP+KYDDLITACLEEGMRSRQYKQKQ+KN+GLLREIVNLAHSD+MSSP

RCC307\_FeiB/1-315 223 MSLSDVCKYLDAGQASLYRVCQYFFGMG IEMMTQIRLEESRRALLRQKDHSQHES TIREVAIRYGF KHAGRYARRYFTSFGELPSQTIQRS ..... 315  
 CC9902\_FeiB/1-318 223 MTLSDVCCQYLDTGQASLYRVCQYFFGMG IEMMTQIRLEEARRALLMFQKNEKNHALTVRDVALGYGFKHGRFRSRRYFTSFGELPSQTLDRSQEL ..... 318  
 CC9311\_FeiB/1-318 223 LSLSDVCKLLNSGQASLYRVCQYFFGMG IEMMTQIRLEEARRAMIFQSTSSQDNNTIREIAIRYGFKHQGRFRSRRYFTSFGELPSQTLRRSKLV ..... 318  
 PROS-U-1\_FeiB/1-321 222 LSLLEVCKHINTSQASLYRVCQYFFGMG IELMTHIRLEESRRMMLNKEARQKLKLYSIRDAIKYGFKHQGRYARRYTAFFGELPSQTIKSSRRYKLPF ..... 321  
 MVIR-18-1\_FeiB/1-318 222 MSLSDVCRHLNSGQASLYRVCQYFFGMG IEMMTQIRLEEARSMIYYSTTSDDNNTIREIAIRYGFKHQGRFRSRRYFTSFGELPSQTLKRSKLL ..... 318  
 WHB016\_FeiB/1-316 223 MSLSDVCRHLNVAQASLYRVCQYFFGMG IEMMTQIRLEEARSLDQCS-ADQNTKTIREIAIRYGFKHQGRFRSRRYFTSFGELPSHTVKHSESL ..... 316  
 WHB020\_FeiB/1-318 222 LSLSEVCKLLNAGQASLYRVCQYFFGMG IEMMTQIRLEEARSMIYKSTNSSQDNNTIREIAIRYGFKHQGRFRSRRYFTSFGELPSQTLKRSKLL ..... 318  
 WHB109\_FeiB/1-321 222 LSLLEVCKYINTSQASLYRVCQYFFGMG IELMTHIRLEESRRIMLNQDARRKLNLYSIRDAIKYGFKHQGRYARRYTAFFGELPSQTIKSSRRYKLPF ..... 321  
 RS9916\_FeiB/1-316 224 MSLSDVCKHLGASQASLYRVCQYFFGMG IEMMTQIRLEESRRALLMQGNHSHQESTIREIAIRYGFKHQGRFRSRRYFTSFGELPSQTIQAS ..... 316  
 BL107\_FeiB/1-318 222 MTLSDVCCQHLDTGQASLYRVCQYFFGMG IEMMTQIRLEEARSLMLLKQDEKNHTLTVRDVAISYGFKHQGRFRSRRYFTSFGELPSQTLDRSKLV ..... 318  
 WHB103\_FeiB/1-321 222 LSLLEVCKHINTSQASLYRVCQYFFGMG IELMTHIRLEESRRMMLNKEARQKLKLYSIRDAIKYGFKHQGRYARRYTAFFGELPSQTIKSSRRYKLPF ..... 321  
 A15-62\_FeiB/1-321 222 LSLLEVCKYINTSQASLYRVCQYFFGMG IELMTHIRLEESRRIMLNQDARRKLNLYSIRDAIKYGFKHQGRYARRYTAFFGELPSQTIKSSRRYKLPF ..... 321  
 BIOS-U3-1\_FeiB/1-315 223 MTLSDVCCQHLDTGQASLYRVCQYFFGMG IEMMTQIRLEESRRALLRQCYQSVAESMIREVAIRYGFKHQGRYARRYTAFFGELPSQTLNNA ..... 315  
 MNOS11\_FeiB/1-332 224 LTLAEVCRQIHTSQASLYRVCQYFFGMG IEMMTQIRLEESRRVLLNSALRYELKLSIRIEAIFHGFKHQGRYARRYTAFFGELPSQTIKSSRRYKLPF ..... 332  
 RS9915\_FeiB/1-321 222 LSLLEVCKHINTSQASLYRVCQYFFGMG IELMTHIRLEESRRMMLNKEARQKLKLYSIRDAIKYGFKHQGRYARRYTAFFGELPSQTIKSSRRYKLPF ..... 321

Consensus

LSLSDVCKHLNLSQASLYRVCQYFFGMG IEMMTQIRLEESRRMLNQSARSKL+LYTIR+IAIRYGFKHQGRYARRYFTSFGELPSQTIKSSRRYKLPF .....  
 LSLSDVCKHLNLSQASLYRVCQYFFGMG IEMMTQIRLEESRRMLNQSARSKL+LYTIR+IAIRYGFKHQGRYARRYFTSFGELPSQTIKSSRRYKLPF .....  
 PS01124

PFAM PF12833  
 SMART SM00342  
 PROFILE PS01124



C

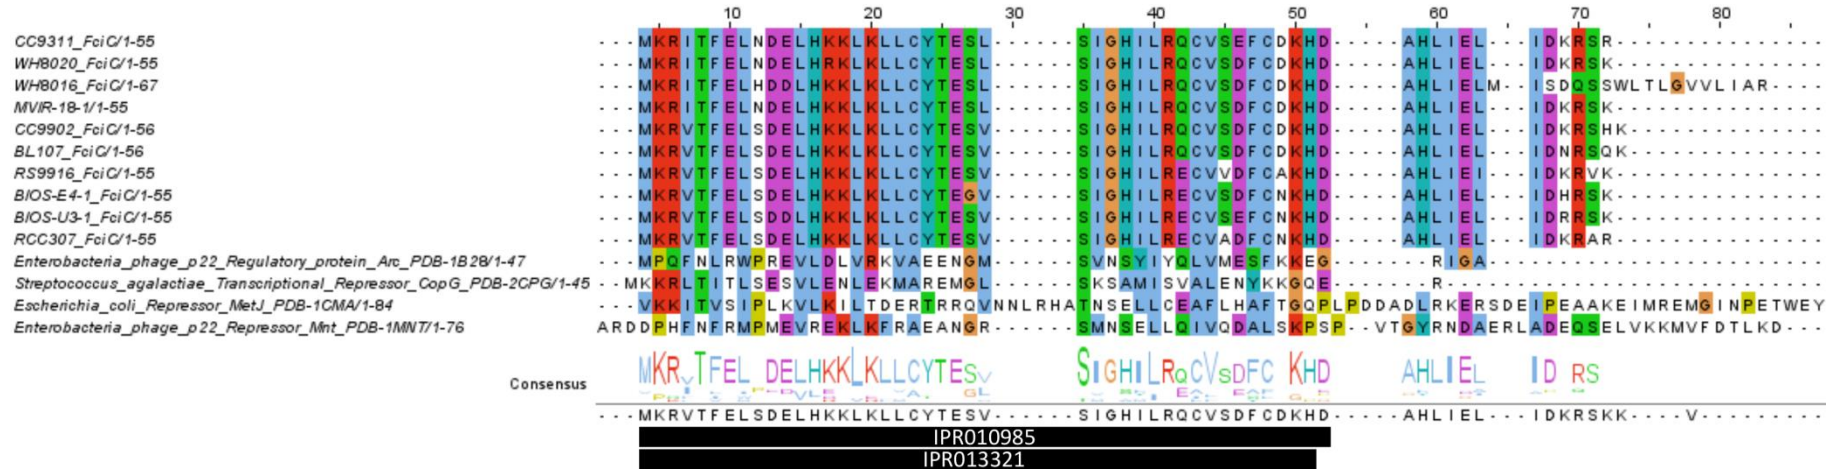

**Figure S1.** Multiple sequence alignments of putative transcriptional regulators FciA (A) and FciB (B), both containing an AraC-like  $\alpha$ -helix-turn- $\alpha$ -helix (HTH, IPR018060) domain, and FciC (C) with a predicted ribbon-helix-helix (IPR010985 and IPR013321). Shading represents identical amino acid in at least 70% of the sequences. Protein domains, framed by a black rectangle, were determined using InterProScan against *Synechococcus* sp. RS9916 sequences, used as reference. *Ab initio* modeling using Phyre2 indicated that 77% of FciA (263 of 342 residues) and 50% of FciB (158 of 316 residues) from *Synechococcus* sp. RS9916 could be modeled with >90% confidence to the AraC/XylS family. Furthermore, 78% of FciC (42 of 55 residues) were modeled based on the CopG-like family (Gomis-Rüth et al., 1998).

Gomis-Rüth, F.X., Solà, M., Acebo, P., Párraga, A., Guasch, A., Eritja, R. et al. (1998) The structure of plasmid-encoded transcriptional repressor CopG unliganded and bound to its operator. *EMBO J* 17(24): 7404-7415.
