# Supplementary material for: A Gene Island with Two Possible Configurations Is Involved in Chromatic Acclimation in Marine Synechococcus
Source: PubMed Central journal article supplement (PMC3877281; doi:10.1371/journal.pone.0084459), 2013-12-31
Supplement: pone.0084459.s002.pdf [file pone.0084459.s002.pdf]

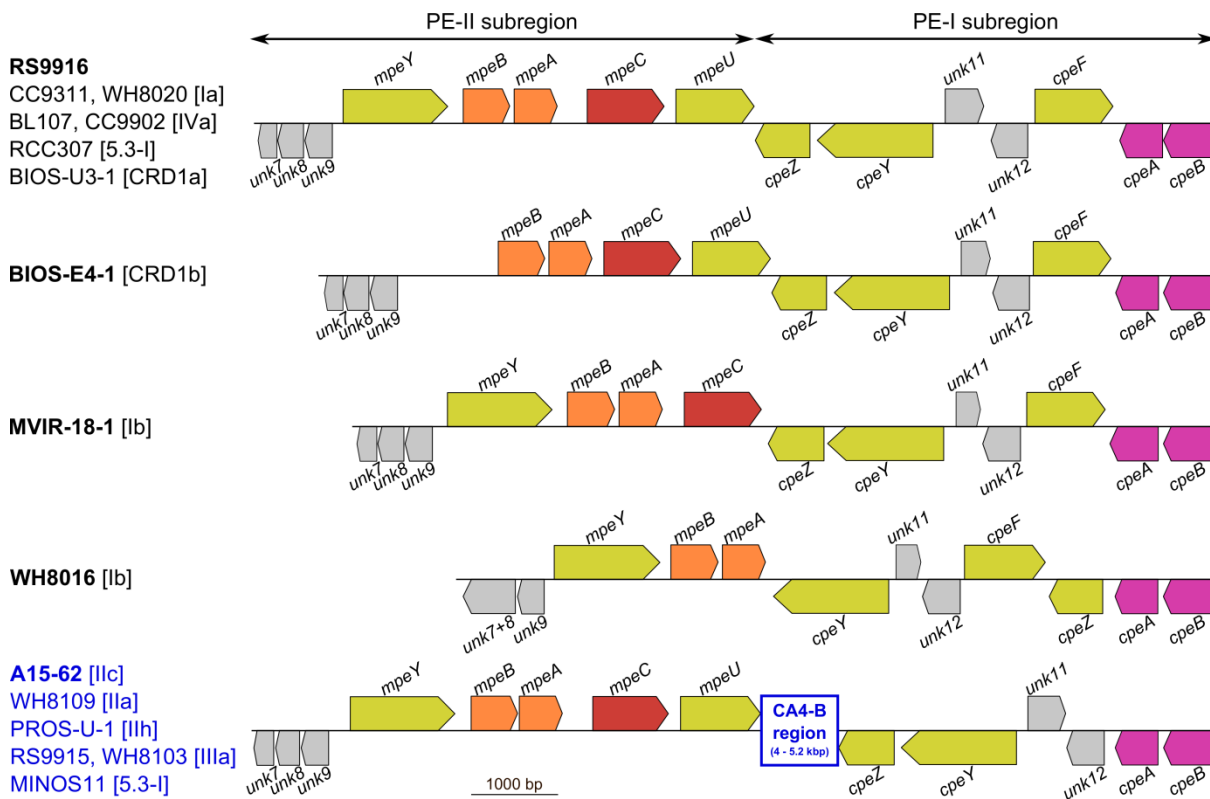

**Figure S2.** Fraction of the PBS rod gene region (including the whole PEII subregion) that varies between marine *Synechococcus* strains containing a CA4-A or B region, listed in black and blue, respectively. Note that the gene organization of WH8016 PBS region is identical to that of the pigment type 3a strain WH7803. See Fig. 6 in Six et al. (2007).
