# Supplementary material for: A Gene Island with Two Possible Configurations Is Involved in Chromatic Acclimation in Marine Synechococcus
Source: PubMed Central journal article supplement (PMC3877281; doi:10.1371/journal.pone.0084459), 2013-12-31
Supplement: pone.0084459.s003.pdf [file pone.0084459.s003.pdf]

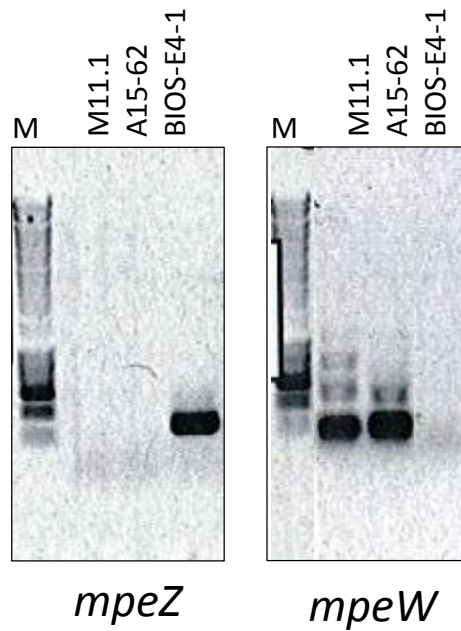

**Figure S3.** Electrophoresis gels showing the presence of *mpeW* in *Synechococcus* sp. M11.1. PCR amplification were performed using a GeneAmp PCR system 9700 (Applied Biosystems, Carlsbad, California) with an initial denaturation step of 5 min at 94 °C, followed by 35 cycles (30 s at 94 °C, 30 s at 50 °C and 1 min at 72 °C) and a final extension step of 10 min at 72 °C and using the following primers: *mpeZ*\_2F, TGGCHGARMGWTTTGATGT; *mpeZ*\_310R, GAYACNGAGGCYGTNATTA; *mpeW*\_175F, KCYACYGGGGAYAGAGA and *mpeW*\_960R, GAACRCCATARTCRGAKCCATG. DNA from strains A15-62 and BIOS-E4-1 were used as positive (*mpeW*-containing strain) and negative (*mpeZ*-containing strain) controls, respectively. M, DNA molecular weight marker (SmartLadder, Eurogentec).
