# Supplementary material for: A Gene Island with Two Possible Configurations Is Involved in Chromatic Acclimation in Marine Synechococcus
Source: PubMed Central journal article supplement (PMC3877281; doi:10.1371/journal.pone.0084459), 2013-12-31
Supplement: pone.0084459.s006.pdf [file pone.0084459.s006.pdf]

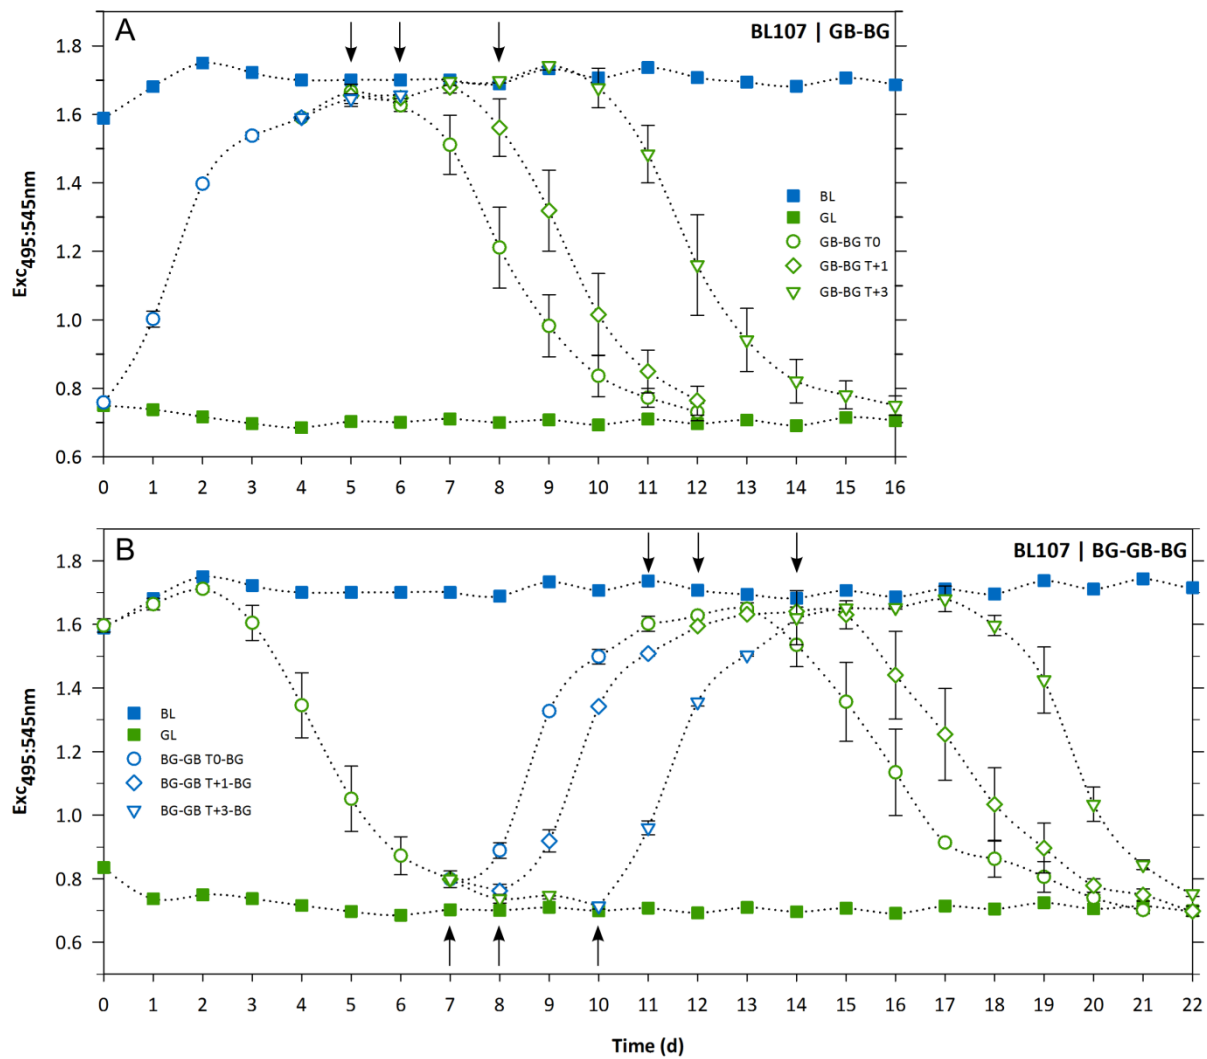

**Figure S6. Effect of successive color shifts on the kinetics of chromatic acclimation in *Synechococcus* sp. BL107.** (A) Effects of the time of BL acclimation on the delay of CA4 initiation, as assessed by significant changes in the  $Exc_{495:545}$  ratio. For this experiment, GL acclimated cultures were first shifted to BL and once they had reached the  $Exc_{495:545}$  ratio in BL, they were shifted back to GL either immediately or after 1 or 3 days; (B) Two successive shifts from BL acclimated cultures. Cultures were shifted to GL and once they had reached minimal  $Exc_{495:545}$  values, cultures were shifted back to BL immediately, or after 1 or 3 days. Finally, cultures were again shifted to GL once they had reached the maximal  $Exc_{495:545}$  values.
