# Supplementary material for: A Gene Island with Two Possible Configurations Is Involved in Chromatic Acclimation in Marine Synechococcus
Source: PLoS One. 2013 Dec 31;8(12):e84459. doi: 10.1371/journal.pone.0084459 (PMC3877281; doi:10.1371/journal.pone.0084459)
Supplement: Table S2 — Kinetics of acclimation of twelve marine Synechococcus strains after shifting cultures to the other light color. Growth rate (µ) were assessed from flow cytometric counts while T50 was calculated from Exc495:545 spectrofluorimetric measurements. Values indicated for individual strains are averages of two biological replicates (± mean deviation) calculated from two biological replicates. Averages (± standard deviation) were also calculated for the different sets of strains gathered by CA4 type or physiological behavior group (see text). (XLSX) [file pone.0084459.s008.xlsx]

## Sheet: Table S2
Table S2. Kinetics of acclimation of twelve marine Synechococcus strains after shifting cultures to the other light color.
Growth rate (µ) were assessed from flow cytometric counts while T50 was calculated from Exc495:545 spectrofluorimetric measurements. Values indicated for individual strains are averages of two biological replicates (± mean deviation) calculated from two biological replicates. Averages (± standard deviation) were also calculated for the different sets of strains gathered by CA4 type or physiologic…
	LL																HL
	BGL								GBL								BGL								GBL
Strain	µ (d-1)				T50 (d)				µ (d-1)				T50 (d)				µ (d-1)				T50 (d)				µ (d-1)				T50 (d)
A15-62	0.6675	±	0.0145		1.96025	±	0.05115		0.6385	±	0.0145		3.2507	±	0.0002		0.9024	±	0.0024		1.341	±	0.0123		0.9024	±	0.0024		2.3008	±	0.0147
BIOS-U3-1	0.72005	±	0.02275		1.94795	±	0.07895		0.5417	±	0.0008		2.90155	±	0.05695		0.9409	±	0.0121		1.48965	±	0.04265		0.876	±	0.0024		1.45185	±	0.05355
BL107	0.4428	±	0.0036		6.03385	±	0.02545		0.5184	±	0.0216		2.5072	±	0.0008		1.1052	±	0.018		2.41345	±	0.01945		1.1892	±	0.1404		1.07265	±	0.00315
CC9311	0.6516	±	0.0228		2.84765	±	0.04155		0.5484	±	0.03		2.35305	±	0.02255
CC9902	0.5958	±	0.0018		3.50315	±	0.00315		0.5424	±	0.0024		2.92885	±	0.02745		0.882	±	0.0204		2.1156	±	0.0054		0.6097	±	0.0767		2.20785	±	0.05785
M11.1	0.4944	±	0.0552		2.3562	±	0.0395		0.6035	±	0.0006		2.29875	±	0.01315		1.0788	±	0.0156		1.1866	±	0.0019		0.9588	±	0.0588		1.7134	±	0.0055
MINOS11	0.71265	±	0.00705		1.80355	±	0.02395		0.5235	±	0.0079		2.76415	±	0.06995		1.0548	±	0.0012		1.047	±	0.0507		1.0548	±	0.0012		1.9095	±	0.1187
RCC307	0.6377	±	0.0235		2.8458	±	0.1917		0.45415	±	0.01055		4.294	±	0.2428
RS9915	0.726	±	0.054		2.2106	±	0.1031		0.7522	±	0.085		2.5839	±	0.0393		1.6008	±	0.0024		1.3171	±	0.02		1.6128	±	0.1104		1.3746	±	0.0278
RS9916	1.29	±	0.01		1.91185	±	0.06525		0.66385	±	0.01635		1.8275	±	0		1.5565	±	0.0755		1.3596	±	0.0382		1.583	±	0.016		1.75	±	0.0875
PROS-U-1	0.41	±	0		1.85985	±	0.09555		0.4235	±	0.0108		3.384	±	0.02		1.27	±	0		1.1217	±	0.0104		1.2505	±	0.0335		1.9723	±	0.0521
WH8020	0.4764	±	0.0084		3.18045	±	0.01525		0.3396	±	0.006		4.65125	±	0.00145		0.7272	±	0.0048		2.19485	±	0.03455		0.5557	±	0.0227		2.45045	±	0.08275
All strains	0.65	±	0.226588		2.7051	±	1.16875		0.545808	±	0.112296		2.97874	±	0.80476		1.11186	±	0.280401		1.55865	±	0.480676		1.05929	±	0.355601		1.82034	±	0.43012
CA4-A island	0.687764	±	0.272442		3.18153	±	1.3386		0.5155	±	0.0968749		3.0662	±	0.998826		1.04236	±	0.301932		1.91463	±	0.437488		0.96272	±	0.411021		1.78656	±	0.52957
CA4-B island	0.60211	±	0.138704		2.03809	±	0.2349		0.58824	±	0.123457		2.8563	±	0.430654		1.18136	±	0.253157		1.20268	±	0.121573		1.15586	±	0.278014		1.85412	±	0.327998
Phenotypic group 1	0.60211	±	0.138704		2.03809	±	0.2349		0.58824	±	0.123457		2.8563	±	0.430654		1.18136	±	0.253157		1.20268	±	0.121573		1.15586	±	0.278014		1.85412	±	0.327998
Phenotypic group 2	0.75	±	0.3		2.68	±	0.68		0.53	±	0.11		2.93	±	1		1.03	±	0.34		1.79	±	0.4		0.91	±	0.44		1.97	±	0.42
Phenotypic group 3	0.5193	±	0.0883957		4.7685	±	1.46125		0.5304	±	0.022514		2.71803	±	0.24447		0.9936	±	0.130765		2.26452	±	0.172752		0.89945	±	0.359171		1.64025	±	0.657113
